# Supplementary material for: Charge recombination suppression in dye-sensitized solar cells by tuning the dielectric constant of triphenylamine dyes with altering π-bridges from naphthalene to anthracene units
Source: Royal Society of Chemistry journal article supplement (doi:10.1039/d2cp02744e), 2022-01-01
Supplement: d2cp02744e1.pdf [file d2cp02744e1.pdf]

*Supporting information for:*

**Charge Recombination Suppressing in Dye-Sensitized Solar Cells by Tuning Dielectric Constant of Triphenylamine Dyes with Altering  $\pi$ -Bridge from Naphthalene to Anthracene Units**

*Karim Khanmohammadi Chenab<sup>1</sup>, Mohammad-Reza Zamani-Meymian<sup>2\*</sup>,*

*Samaneh Mahmoudi Qashqay<sup>3</sup>*

*<sup>1</sup>Department of Chemistry, Iran University of Science and Technology, P.O. Box 16846-13114, Tehran, Iran.*

*<sup>2,3</sup>Department of Physics, Iran University of Science and Technology, P.O. Box 16846-13114, Tehran, Iran.*

**Corresponding Author:** *Mohammad-Reza Zamani Meymian\**, Email: [r\\_zamani@iust.ac.ir](mailto:r_zamani@iust.ac.ir), Telephone Number: (+98) 21 7322 5893 . Fax: (+98) 21 7724 0497

- 1- FT-IR spectrum of **TpAzo 1**: (KBr, 298 K): aromatic C-H stretch  $\nu$  [3026  $\text{cm}^{-1}$ ], in-plane bends aromatic C-H  $\nu$  [1150  $\text{cm}^{-1}$ ], out-of-plane bends aromatic C-H  $\nu$  [725  $\text{cm}^{-1}$ ], stretch aromatic C=C  $\nu$  [1550  $\text{cm}^{-1}$ ], stretch C-N  $\nu$  [1277  $\text{cm}^{-1}$ ], stretch N=N  $\nu$  [2300  $\text{cm}^{-1}$ ], H-bonded stretch monomer O-H  $\nu$  [3450  $\text{cm}^{-1}$ ], stretch dimer H-bonded O-H  $\nu$  [2950  $\text{cm}^{-1}$ ], bend out-of-plane O-H  $\nu$  [937  $\text{cm}^{-1}$ ], stretch monomer H-bonded C=O  $\nu$  [1600  $\text{cm}^{-1}$ ], in-plane bend C-O-H  $\nu$  [1450  $\text{cm}^{-1}$ ] and stretch C-O  $\nu$  [1240  $\text{cm}^{-1}$ ].

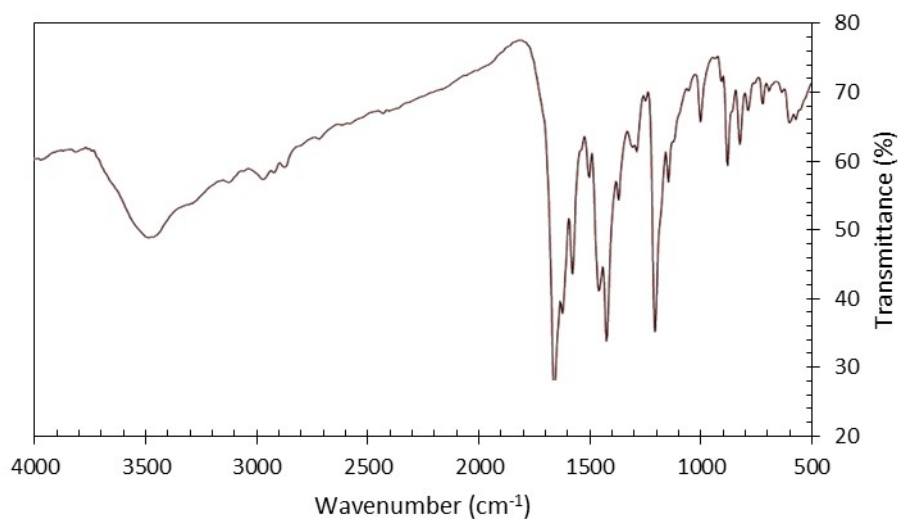

**Fig. 1S.** FT-IR spectrum of **TpAzo 1**

- 2- FT-IR spectrum of **TpAzo 2**: (KBr, 298 K): stretch aromatic C-H  $\nu$  [3026  $\text{cm}^{-1}$ ], in-plane bends aromatic C-H  $\nu$  [1150  $\text{cm}^{-1}$ ], out-of-plane bends aromatic C-H  $\nu$  [725  $\text{cm}^{-1}$ ], aromatic stretch C=C  $\nu$  [1550  $\text{cm}^{-1}$ ], stretch C-N  $\nu$  [1277  $\text{cm}^{-1}$ ], stretch N=N  $\nu$  [2300  $\text{cm}^{-1}$ ], stretch monomer H-bonded O-H  $\nu$  [3450  $\text{cm}^{-1}$ ], stretch dimer H-bonded O-H  $\nu$  [2950  $\text{cm}^{-1}$ ], bend out-of-plane O-H  $\nu$  [937  $\text{cm}^{-1}$ ], stretch monomer H-bonded C=O  $\nu$  [1600  $\text{cm}^{-1}$ ], in-plane bend C-O-H  $\nu$  [1450  $\text{cm}^{-1}$ ] and stretch C-O  $\nu$  [1240  $\text{cm}^{-1}$ ].

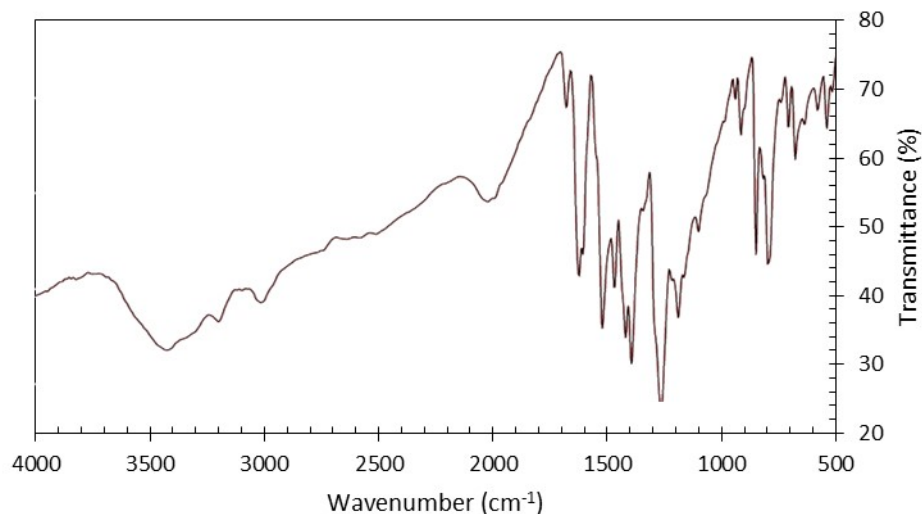

**Fig. 2S.** FT-IR spectrum of **TpAzo 2**

- 3-  $^1\text{H}$  &  $^{13}\text{C}$ -NMR and Mass spectra **TpAzo 1**:  $^1\text{H}$  NMR ( $\text{CDCl}_3$ ):  $\delta$  [ppm]: 8.31 (dddt,  $J = 1.8, 1.7, 0.5, 0.4$  Hz), 8.29-8.34 (2H, 8.33 (tq,  $J = 1.7, 0.4$  Hz), 8.07 (1H, ddt,  $J = 7.1, 1.7, 0.4$  Hz), 8.01 (ddd,  $J = 7.1, 1.7, 0.4$  Hz), 7.93-8.03 (2H, 7.96 (ddt,  $J = 8.8, 1.8, 0.4$  Hz), 7.73 (2H, ddd,  $J = 8.6, 2.7, 0.4$  Hz), 7.61 (dddd,  $J = 8.3, 7.2, 1.7, 0.5$  Hz), 7.56-7.66 (5H, 7.62 (ddd,  $J = 8.8, 1.8, 0.4$  Hz), 7.51 (2H, ddd,  $J = 8.6, 1.5, 0.4$  Hz), 7.23-7.35 (6H, 7.26 (dddd,  $J = 8.3, 1.3, 1.2, 0.5$  Hz), 7.32 (tt,  $J = 7.2, 1.2$  Hz)).  $^{13}\text{C}$  NMR ( $\text{CDCl}_3$ ):  $\delta$  [ppm]: 167.1, 149.5, 147.9, 147.9, 147.3, 132.7, 131.8, 128.9, 128.6, 128.2, 127.8, 127.3, 127.1, 125.0, 124.5, 124.2, 119.2, 115.0, 114.4. Mass [ $m/z$ ].  $\text{C}_{29}\text{H}_{21}\text{N}_3\text{O}_2$  [ $\text{M}^+$ ], Found. 451; Calcd. 452.

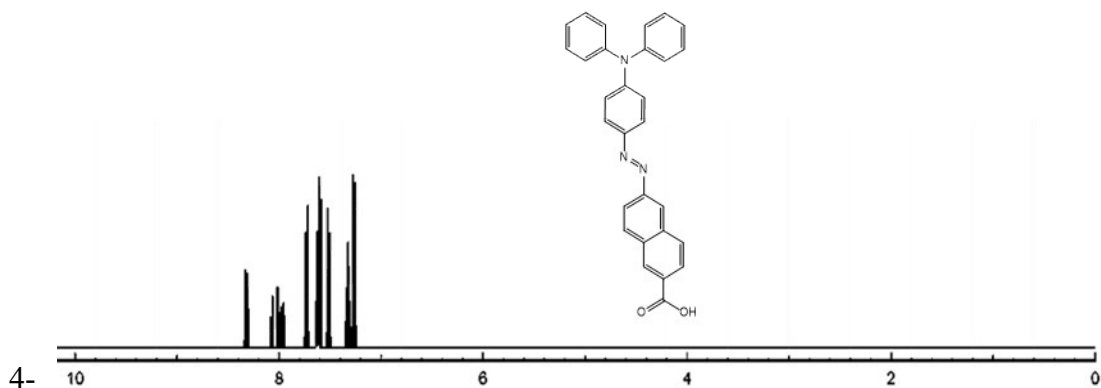

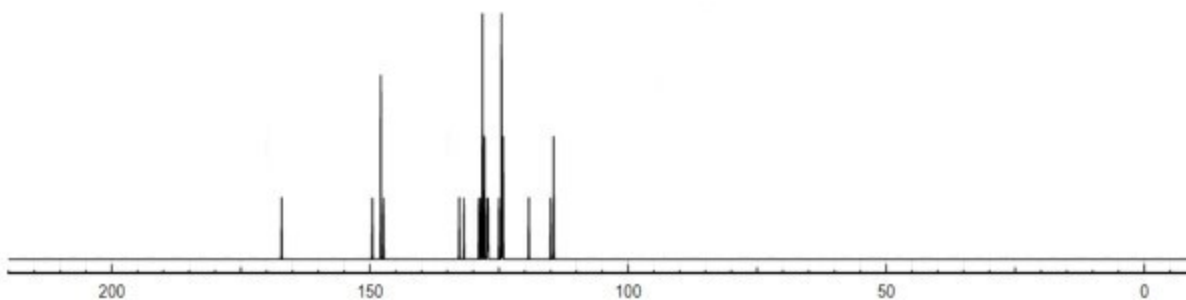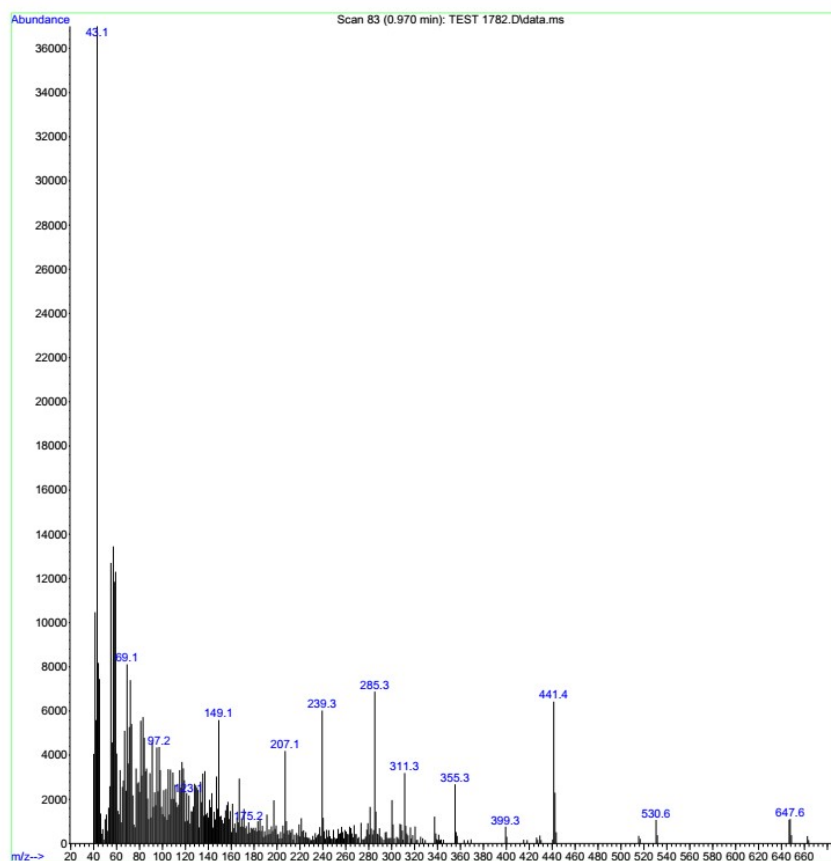

**Fig. 3S.**  $^1\text{H}$  &  $^{13}\text{C}$ -NMR and Mass spectra **TpAzo 1**:

- 1-  $^1\text{H}$  &  $^{13}\text{C}$ -NMR and Mass spectra **TpAzo 2**:  $^1\text{H}$  NMR ( $\text{CDCl}_3$ ):  $\delta$  [ppm]: 8.59 (1H, dd,  $J = 1.7, 0.6, 0.4$  Hz), 8.23-8.30 (2H, 8.25 (ddt,  $J = 5.9, 1.7, 0.5$  Hz), 8.28 (dddd,  $J = 1.7, 1.5, 0.5, 0.4$  Hz)), 7.96 (1H, ddd,  $J = 5.9, 1.7, 0.4$  Hz), 7.83-7.92 (2H, 7.88 (dddd,  $J = 8.2, 2.2, 1.7, 0.4$  Hz), 7.85 (ddq,  $J = 1.7, 1.5, 0.5$  Hz)), 7.78 (ddd,  $J = 10.1, 2.2, 0.4$  Hz)), 7.61 (dddd,  $J = 8.3, 7.2, 1.6, 0.5$  Hz), 7.71 (ddd,  $J = 10.1, 8.2, 0.5$  Hz), 7.56-7.82 (8H, 7.79 (ddd,  $J = 7.6, 2.6, 0.4$  Hz), 7.50 (2H, ddd,  $J = 7.6, 1.7, 0.4$  Hz), 7.30-7.42 (6H, 7.38 (dtd,  $J = 8.3, 1.2, 0.5$  Hz), 7.33 (tt,  $J = 7.2, 1.2$  Hz)).  $^{13}\text{C}$  NMR ( $\text{CDCl}_3$ ),  $\delta$  [ppm]: 169.3, 126.8, 126.8, 129.8, 129.6, 129.6, 125.9, 129.6, 129.6, 124.7, 130.3, 128.3, 125.7, 125.7, 125.9, 125.1, 130.8, 125.8, 125.5, 125.7, 125.7, 125.9, 125.1, 120.2, 127.7, 133.2, 130.4,

132.9, 123.0, 124.5, 145.9, 148.1, 149.7, 152.1. Mass [ $m/z$ ].  $C_{31}H_{23}N_3O_2$  ( $M^+$ ), Found: 475; Calcd: 476.

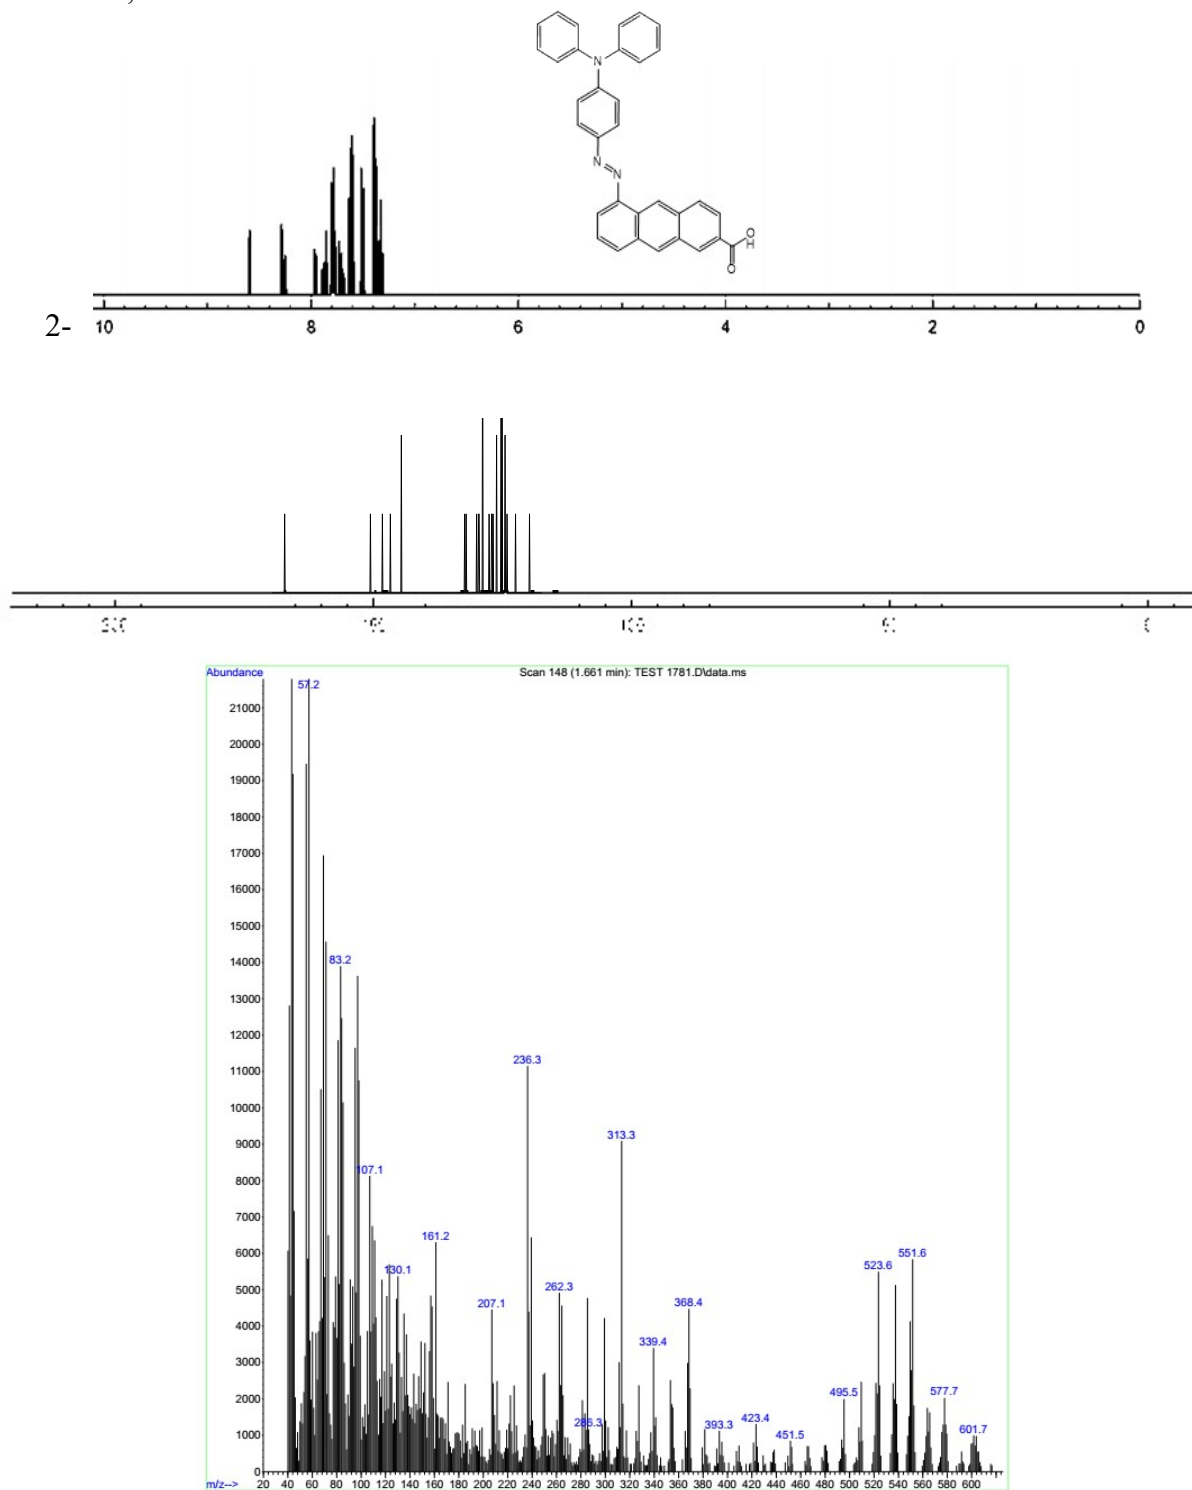

Fig. 4S.  $^1H$ -NMR,  $^{13}C$ -NMR and Mass spectroscopy analysis of TpAzo 2 dye
